# Supplementary material for: Identification of Autoantibodies to a Hybrid Insulin Peptide in Type 1 Diabetes
Source: MDPI journal article supplement (doi:10.3390/diagnostics13172859), 2023-09-04
Supplement: s1 [file s1]

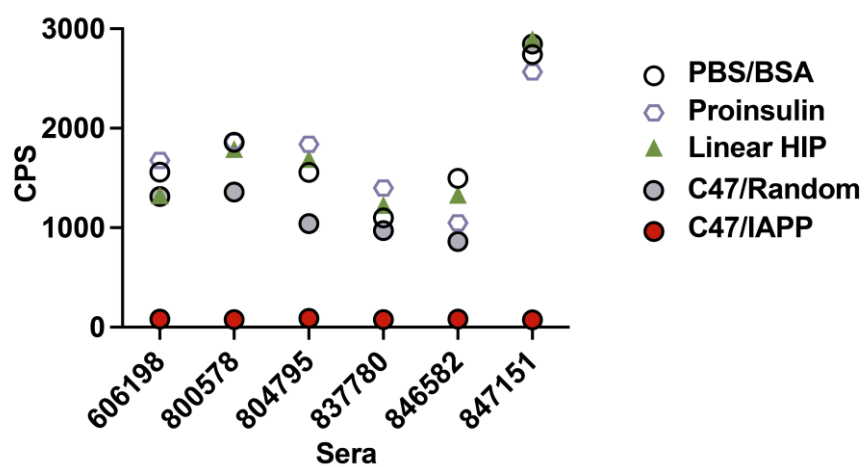

**Supplementary Figure S1. Investigation of pre-absorption of C47/IAPP HIP antibodies using unlabeled Linear HIP or C47/Random probes.** Sera was preincubated with the indicated proteins prior to ECL assay. Graph showing binding of T1D patient sera to labeled C47/IAPP after pre-absorption with C47/IAPP (solid red circles), linear HIP (green closed triangles), proinsulin (gray open circles), C47/Random probe (gray closed circles) or non-specific (PBS) control (black open circles). C47/Random is an identical probe to C47/IAPP with the IAPP amino acids in reverse sequence.
